# Supplementary material
Source: publisher figshare collection journal article supplement (https://gsajournals.figshare.com/articles/dataset/_/6281537)
Supplement: Supplementary file 1 [file 1]

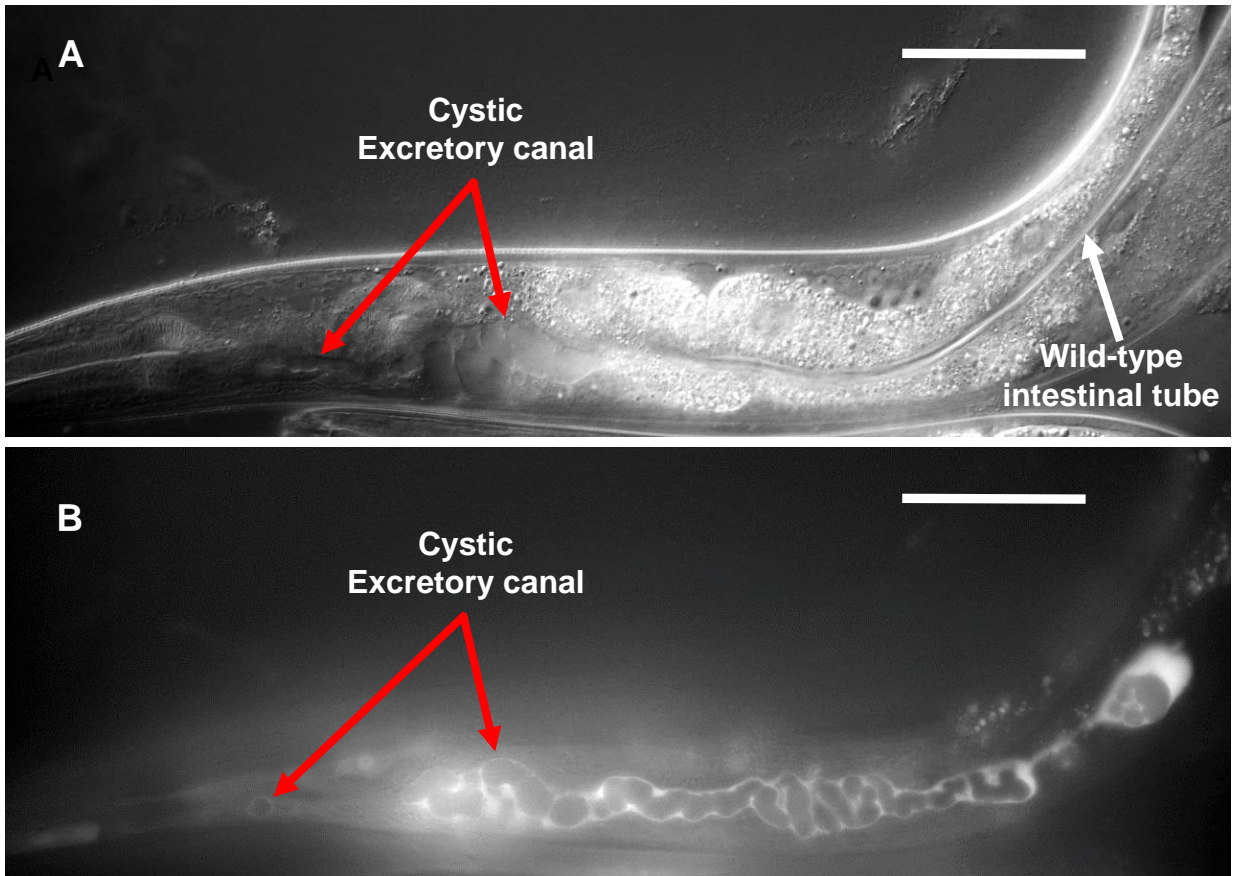

**Figure S3. RNAi-knockdown of Isoforms A, B, and D.**

Typical animal treated with injected dsRNA #2 specific for knockdown of *exc-2* isoforms A, B, and D. Top, DIC image shows cystic anterior and posterior canals, and intestine with wild-type lumen. Bottom, Fluorescent image shows cystic short canals. Bars, 50µm.
