# Supplementary material
Source: publisher figshare collection journal article supplement (https://gsajournals.figshare.com/articles/dataset/_/6281537)
Supplement: Supplementary file 2 [file 1]

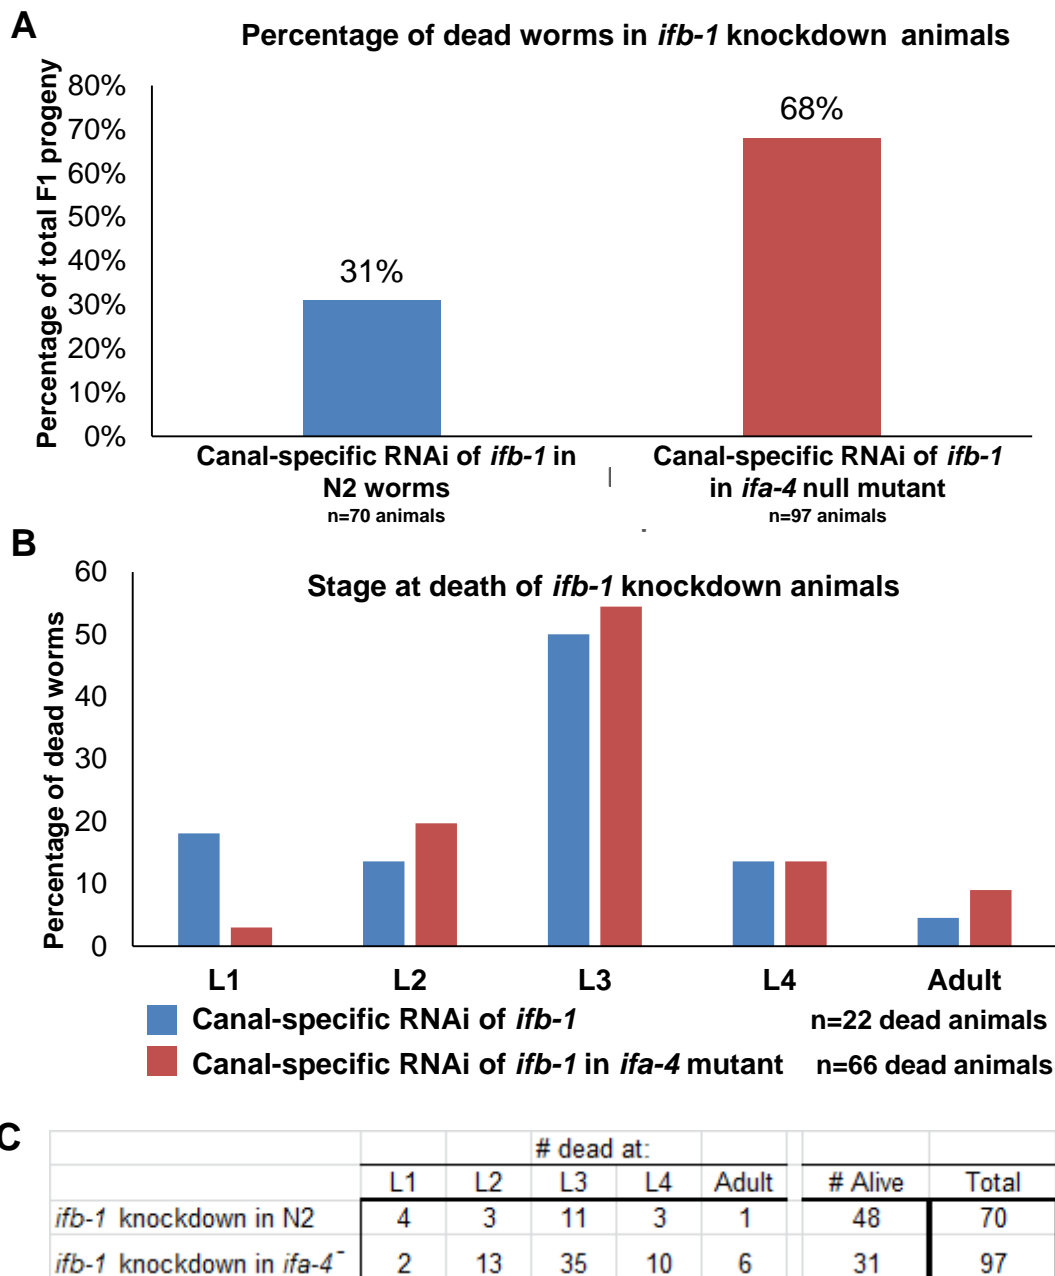

**Figure S5. Lethality of canal-specific *ifb-1* knockdown.**

Measurements of lethality of canal-specific knockdown of *ifb-1* in N2 (blue bars) and in the *ifa-4(ok1734)* deletion mutant (red bars). (A) Percentage of dead animals observed in each strain. (B) Stage of death for dead animals. (C) Data used for previous panels: Number found alive, and number dead at different life stages.
