# Supplementary material
Source: publisher figshare collection journal article supplement (https://gsajournals.figshare.com/articles/dataset/_/6281537)
Supplement: Supplementary file 3 [file 1]

**Excretory canal**

***exc-2(rh90)***

**Intestinal tube**

***exc-2(rh105)***

***exc-2(rh209)***

***exc-2(rh247)***

***exc-2(qp110)***

**Figure S1. Phenotype of all *exc-2* alleles.**

DIC images of excretory canals (left) and intestine (right) in all four EMS-derived mutant strains, and in strain BK530 [CRISPR/Cas9-induced *exc-2* deletion]. All animals showed characteristically strong cystic defects comparable to those in other *exc-2* alleles in 100% of canals examined. No defects were seen in intestinal diameter, and all exhibit wild-type morphology. Top to bottom: *exc-2(rh90)*, *exc-2(rh105)*, *exc-2(rh209)*, *exc-2(rh247)*, and *exc-2(qp110)* CRISPR/Cas9-induced deletion strain. A control excretory canal is shown in Fig. 1B.
