# Supplementary material
Source: publisher figshare collection journal article supplement (https://gsajournals.figshare.com/articles/dataset/_/6281537)
Supplement: Supplementary file 5 [file 1]

**Table S2. Sequence alterations in *exc-2* and *ifa-4* alleles**

Mutations in *exc-2* and *ifa-4*, including deletions and sites of insertion induced by CRISPR/Cas9 modification. Numbers indicate bases of the X chromosome (non-template strand) as presented on Wormbase Release WS262. Capital letters indicate coding regions. “-“ indicates base deleted. Arrows indicate site of insertion of indicated fluorescent and antigenic tags.

| Description                                                           | Sequence (5'-to-3') of non-template strand.                                                                                                                                                                                                                                                                                                                                                                                                                                                                                                                                            |
|-----------------------------------------------------------------------|----------------------------------------------------------------------------------------------------------------------------------------------------------------------------------------------------------------------------------------------------------------------------------------------------------------------------------------------------------------------------------------------------------------------------------------------------------------------------------------------------------------------------------------------------------------------------------------|
| <i>exc-2</i> wild-type sequence surrounding exon 8                    | <p>X: 648662 648638</p> <p>   </p> <p>...gatttccccccccccccctccccctcaatccaagtcacctacgatctgcttt...</p> <p>X: 648537 648518</p> <p>   </p> <p>...CAATCGAACCACCTAGAAAGAAAGAGATCAAAACCGAGATGCCAACTGTGAACG...</p> <p>X: 648285 648244</p> <p>   </p> <p>...gcgaagtttttgtagtattgatatctgtaaacctgaaaaattttcatatata...</p>                                                                                                                                                                                                                                                                       |
| <i>exc-2(rh90)</i> :<br>3 deletions in region surrounding exon 8      | <p>...gattt-----ccaagtcacctacgatctgcttt...</p> <p>...CAATCGAACCACCT-----CGAGATGCCAACTGTGAACG...</p> <p>...gcgaag-----atata...</p>                                                                                                                                                                                                                                                                                                                                                                                                                                                      |
| <i>exc-2</i> wild-type sequence prior to exon 8                       | <p>X: 648672</p> <p> </p> <p>...gcattgttttttacgttggtttgtcccagatttccccccccccccctccccctc<br/>aatccaagtcacctacgatctgcttttttacatgttcagtttttttttgga<br/>aagttgtttgcagtttaatatcatcagttttccagCAATCGAACCACCTAGAAAGA<br/>AAGAGATCAAAACCGAGATGCCAACTGTGAACGCCTTGACCAAACAATTTGAAAT<br/>TTCGTTCGACGAGGAAAAAGTCGTTCCGTTGAAACCAAGAAAAAGCTCCAATGT...</p> <p> </p> <p>X: 648460</p> <p>X: 647477 X: 647440</p> <p>   </p> <p>...CTAAGATTGGAGgtttgtacatactgttggtggaatgctgaccgactaacgtc...</p> <p>X: 645222 X: 645191</p> <p>   </p> <p>...caattgcagGTTTCGTTTTCTGGAAGCTCAAAACCGATGCCTCAGCCACGATAT...</p> |
| Sequence at end of exon 10                                            |                                                                                                                                                                                                                                                                                                                                                                                                                                                                                                                                                                                        |
| Sequence at start of exon 15                                          |                                                                                                                                                                                                                                                                                                                                                                                                                                                                                                                                                                                        |
| <i>exc-2(rh105)</i> :<br>Deletions at exon 8, exon 10, and at exon 15 | <p>...gcattgttttttacgttggttttg-----</p> <p>-----</p> <p>-----</p> <p>-----</p> <p>-----AAAGTCGTTCCGTTGAAACCAAGAAAAAGCTCCAATGT...</p> <p>...CTAAGATTG-----aacgtc...</p> <p>...caattg-----CCTCAGCCACGATAT...</p>                                                                                                                                                                                                                                                                                                                                                                         |
