# Supplementary material
Source: publisher figshare collection journal article supplement (https://gsajournals.figshare.com/articles/dataset/_/6281537)
Supplement: Supplementary file 6 [file 1]

Fluorescence

DIC

Merge

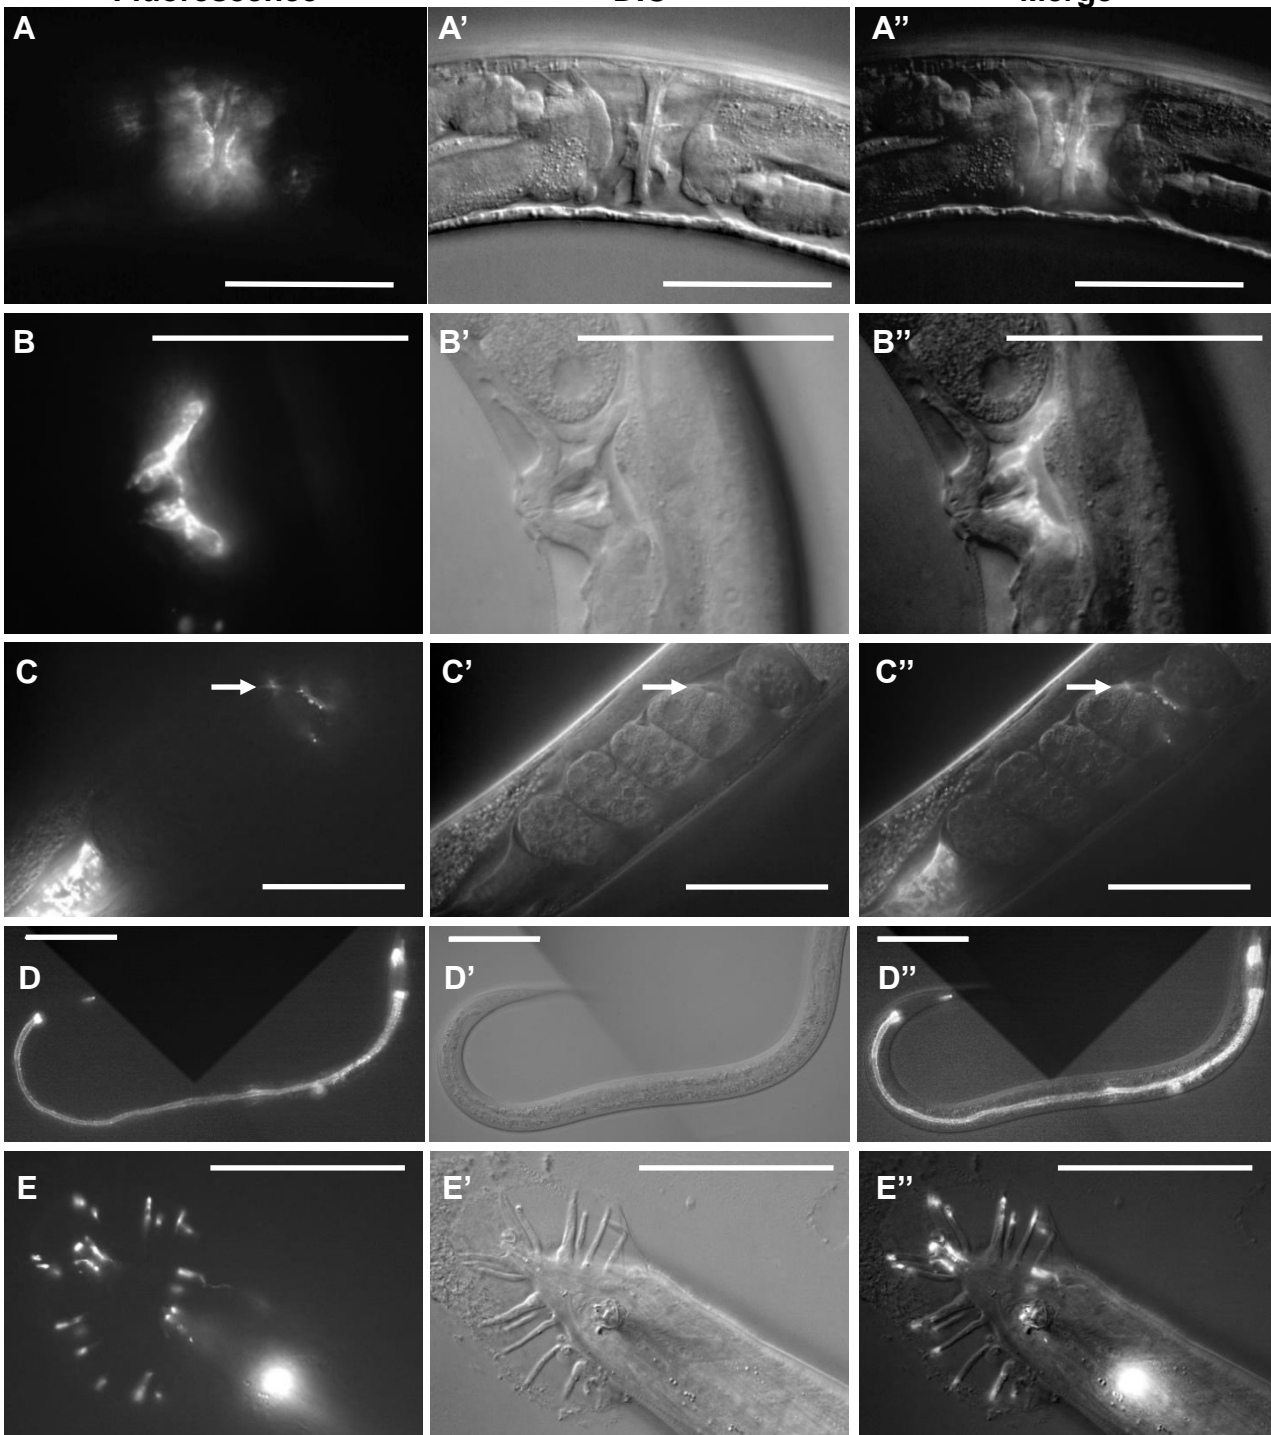

### **Figure S4. Location of *ifa-4* expression.**

Images of mKate2-labeled IFA-4 expression outside of the excretory canals. Left, fluorescent image; center, DIC image of tissue; right, merged images. (A) Ventral view of IFA-4 in the uterine muscles; (B) Lateral view of uterine muscle; (C) Spermathecal-uterine valve (white arrow); (D) Intestine of long-lived dauer stage (starved) worm; (E) IFA-4 at tips of the 18 male-tail rays and hook sensillum.
