# Supplementary material
Source: publisher figshare collection journal article supplement (https://gsajournals.figshare.com/articles/dataset/_/6281537)
Supplement: Supplementary file 7 [file 1]

**Table S1. Primer Sequences.**

Primers sequences used to synthesize dsRNA specific for *exc-2* isoforms. T7 promoters are underlined.

| <b>Primer</b>                       | <b>Sequence (5'-to-3')</b>                                      |
|-------------------------------------|-----------------------------------------------------------------|
| <i>exc-2</i> isoforms A, B, C (Fwd) | <u>TAATACGACTCACTATAGGG</u> ACCACATCGAGTTGAGCCTACAAG            |
| <i>exc-2</i> isoforms A, B, C (Rev) | <u>TAATACGACTCACTATAGGG</u> CTCTCAGGCGGTTGTGATCTGTC             |
| <i>exc-2</i> isoforms A, B, D (Fwd) | <u>TAATACGACTCACTATAGGG</u> TCAACGCCGTCAAAGCTCATC               |
| <i>exc-2</i> isoforms A, B, D (Rev) | <u>TAATACGACTCACTATAGGG</u> CATAATCGGCACGGATGTCACG              |
| <i>exc-2</i> isoform A (Fwd)        | <u>TAATACGACTCACTATAGGG</u> C TTCACAACTTGTTGCCGTTCC             |
| <i>exc-2</i> isoform A (Rev)        | <u>TAATACGACTCACTATAGGG</u> CATGCGCAGCATCTTGATTAGC              |
| <i>exc-2</i> isoform C (Fwd)        | <u>TAATACGACTCACTATAGGG</u> ACCTGAACTTTGCGGGAC                  |
| <i>exc-2</i> isoform C (Rev)        | <u>TAATACGACTCACTATAGGG</u> CTAAGTACAAAGAAAGTAGTGTATAAAATGAACTG |
| <i>exc-2</i> isoform D (Fwd)        | <u>TAATACGACTCACTATAGGG</u> GAGAAGTAGTATAGGCCGCGTAAG            |
| <i>exc-2</i> isoform D (Rev)        | <u>TAATACGACTCACTATAGGG</u> CATAGGTGGAGTCGCAAGG                 |
